# Supplementary material
Source: Springer Nature journal article supplement (https://www.springermedizin.de/resource/supplementary/13058_2011_2869_MOESM6_ESM.pdf/9702758)

**A****All cases (n=190)**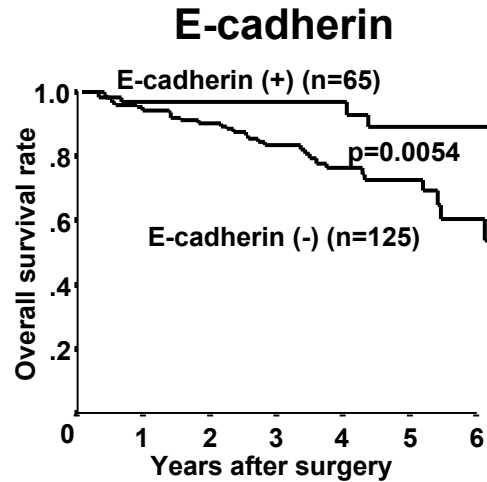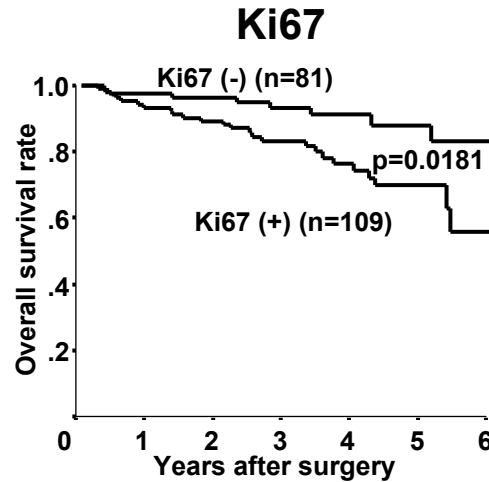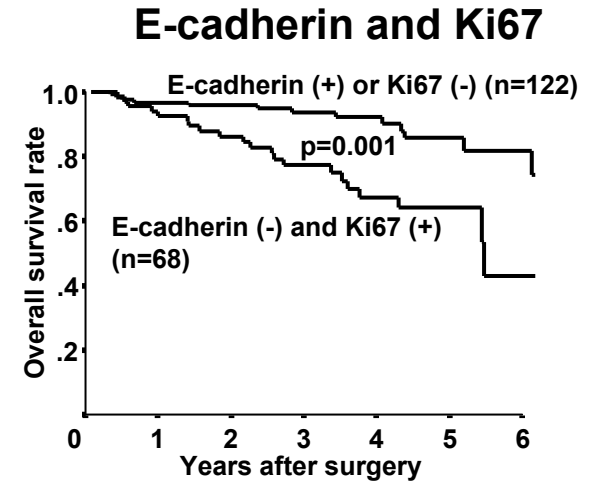**B****Stage II cases (n=107)**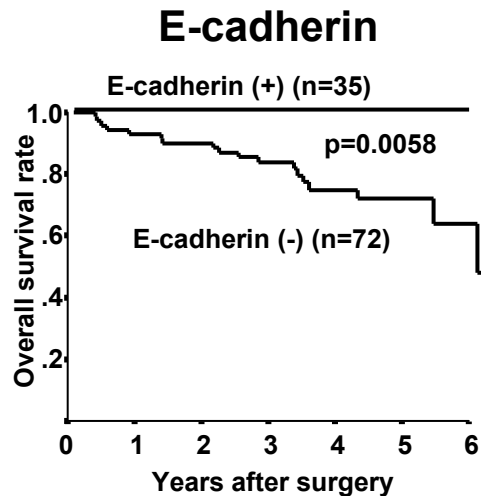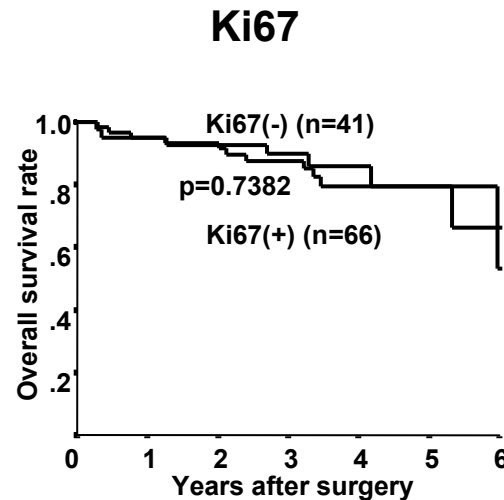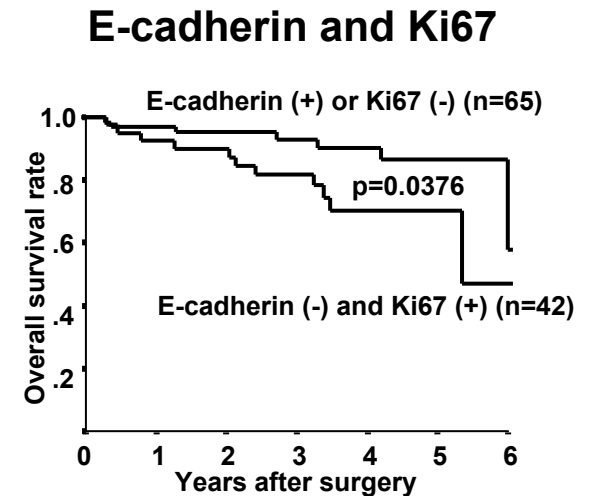

Supplement: MOESM6 [file 9702758]
